# Supplementary material
Source: PubMed Central journal article supplement (PMC124498)

2 x core  
(single)

I II III IV V

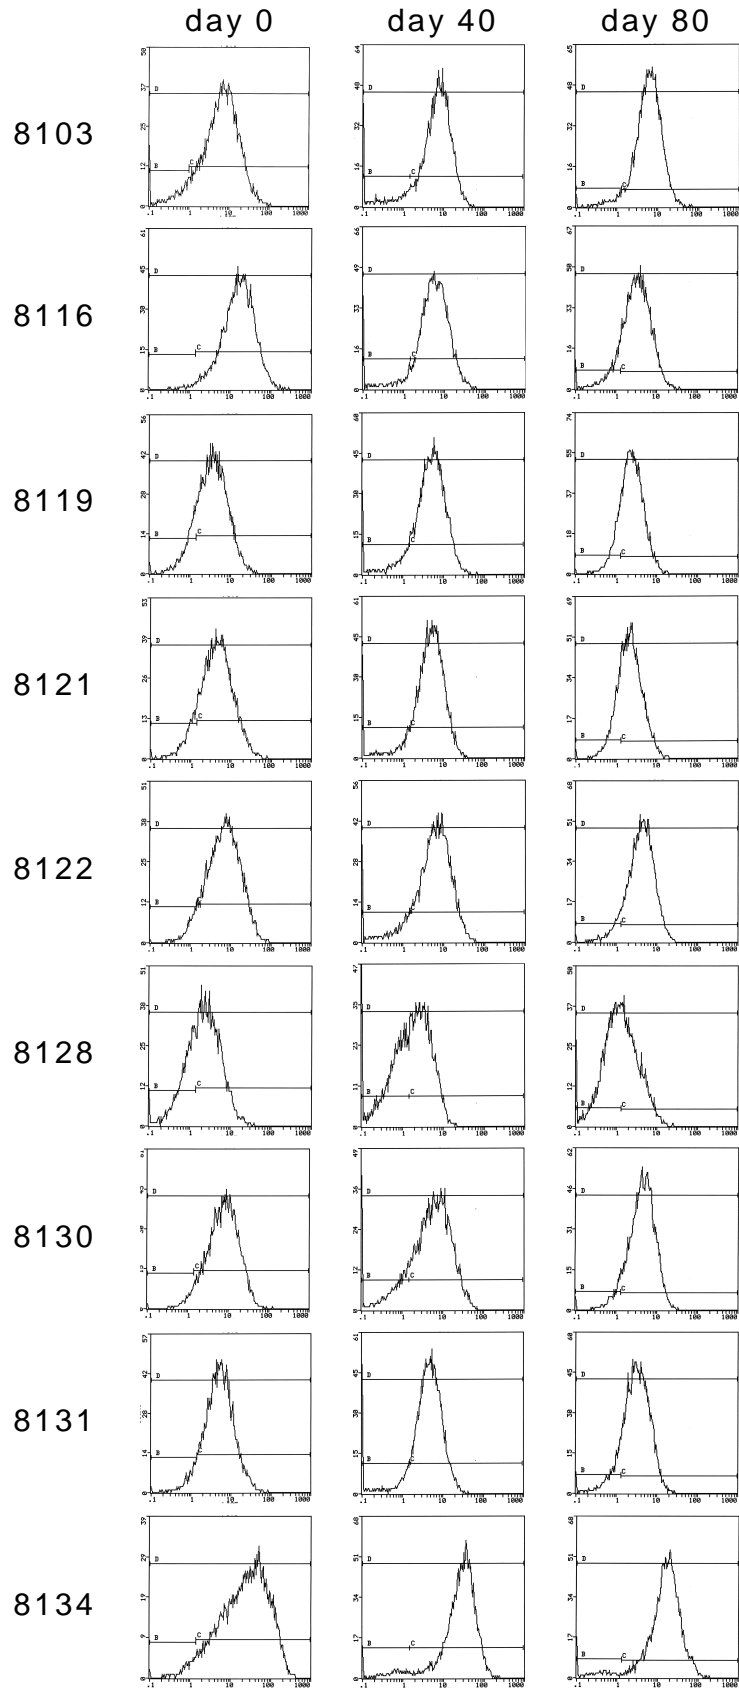

Supplement: pnas_99_10_6883__17.pdf [file pnas_99_10_6883__17.pdf]

2 x core  
(multi)

I II III IV V

day 0

day 40

day 80

8101

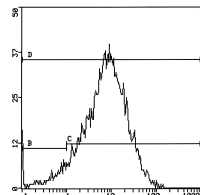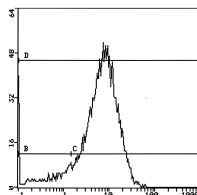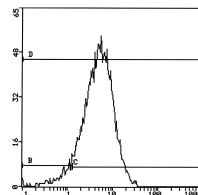

8102

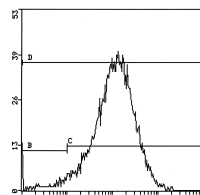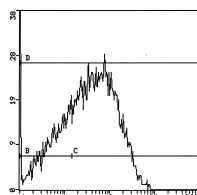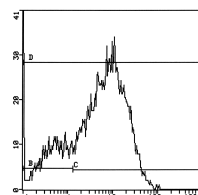

8104

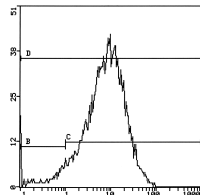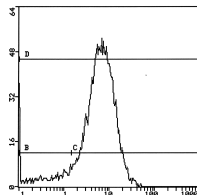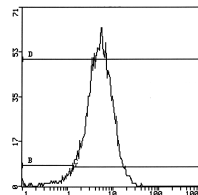

8110

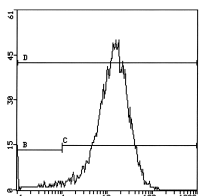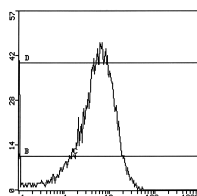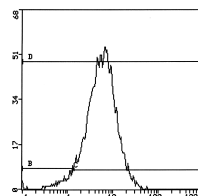

8112

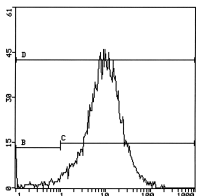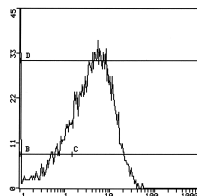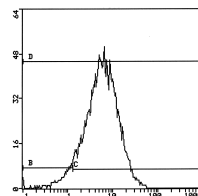

8113

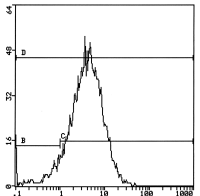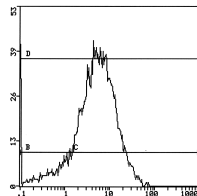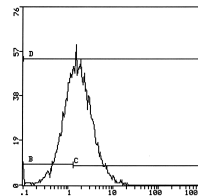

8125

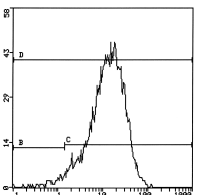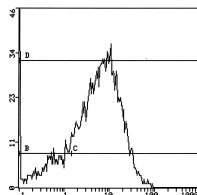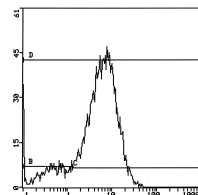

8126

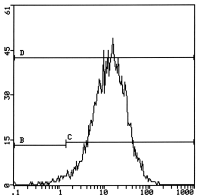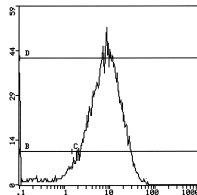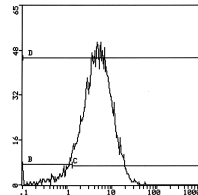

Supplement: pnas_99_10_6883__18.pdf [file pnas_99_10_6883__18.pdf]

(a)

2 x 3'HS

(single)

day 0

day 40

day 80

9027

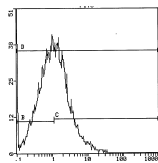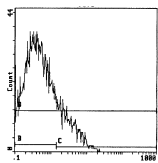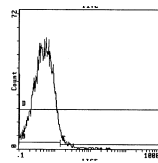

9031

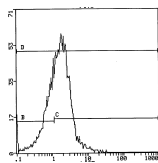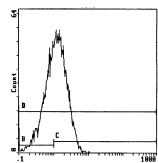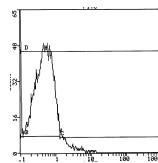

9033

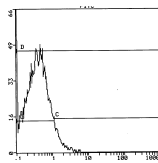

9038

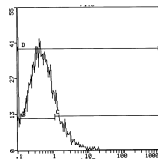

9039

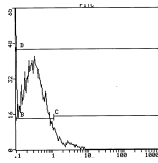

(b)

2 x 3'HS

(multi)

9025

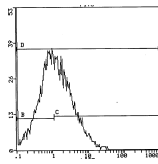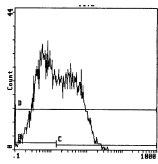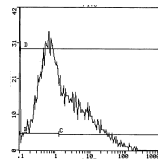

9030

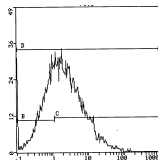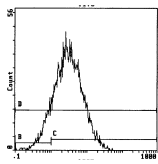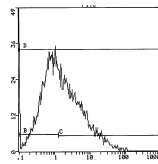

9032

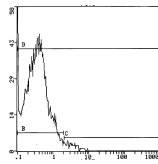

9035

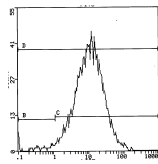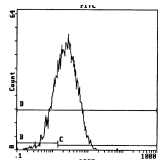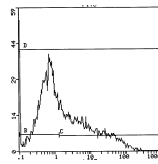

9041

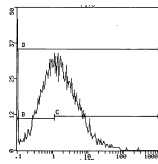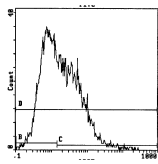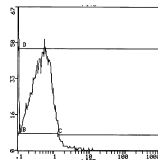

Supplement: pnas_99_10_6883__19.pdf [file pnas_99_10_6883__19.pdf]

2 x core DII  
(single)

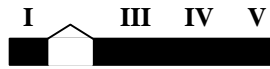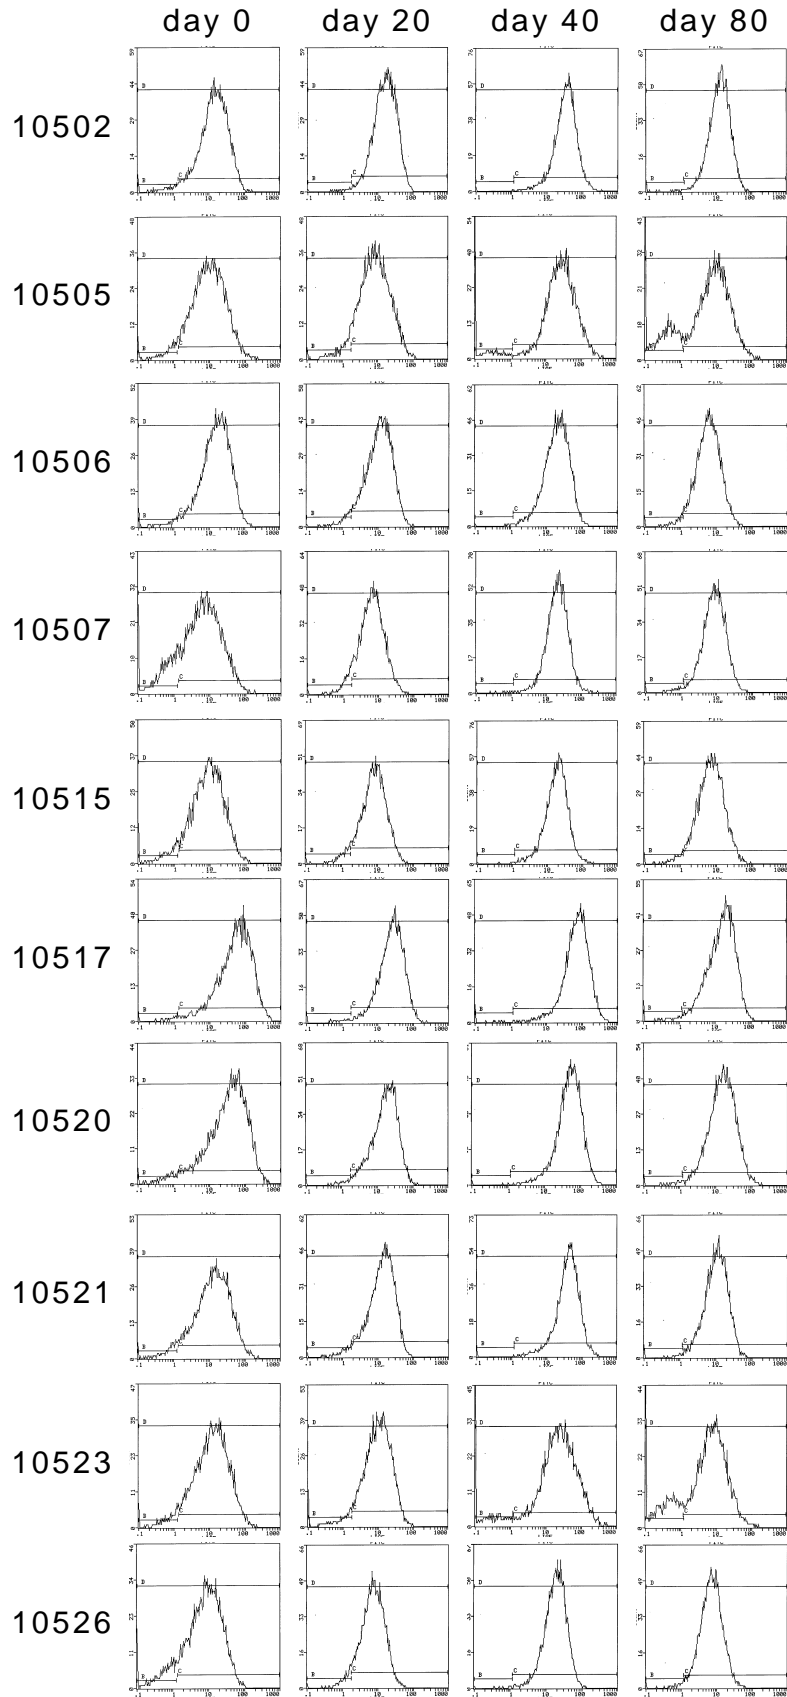

Supplement: pnas_99_10_6883__20.pdf [file pnas_99_10_6883__20.pdf]

2 x core DII  
(multi)

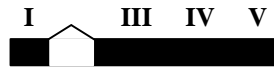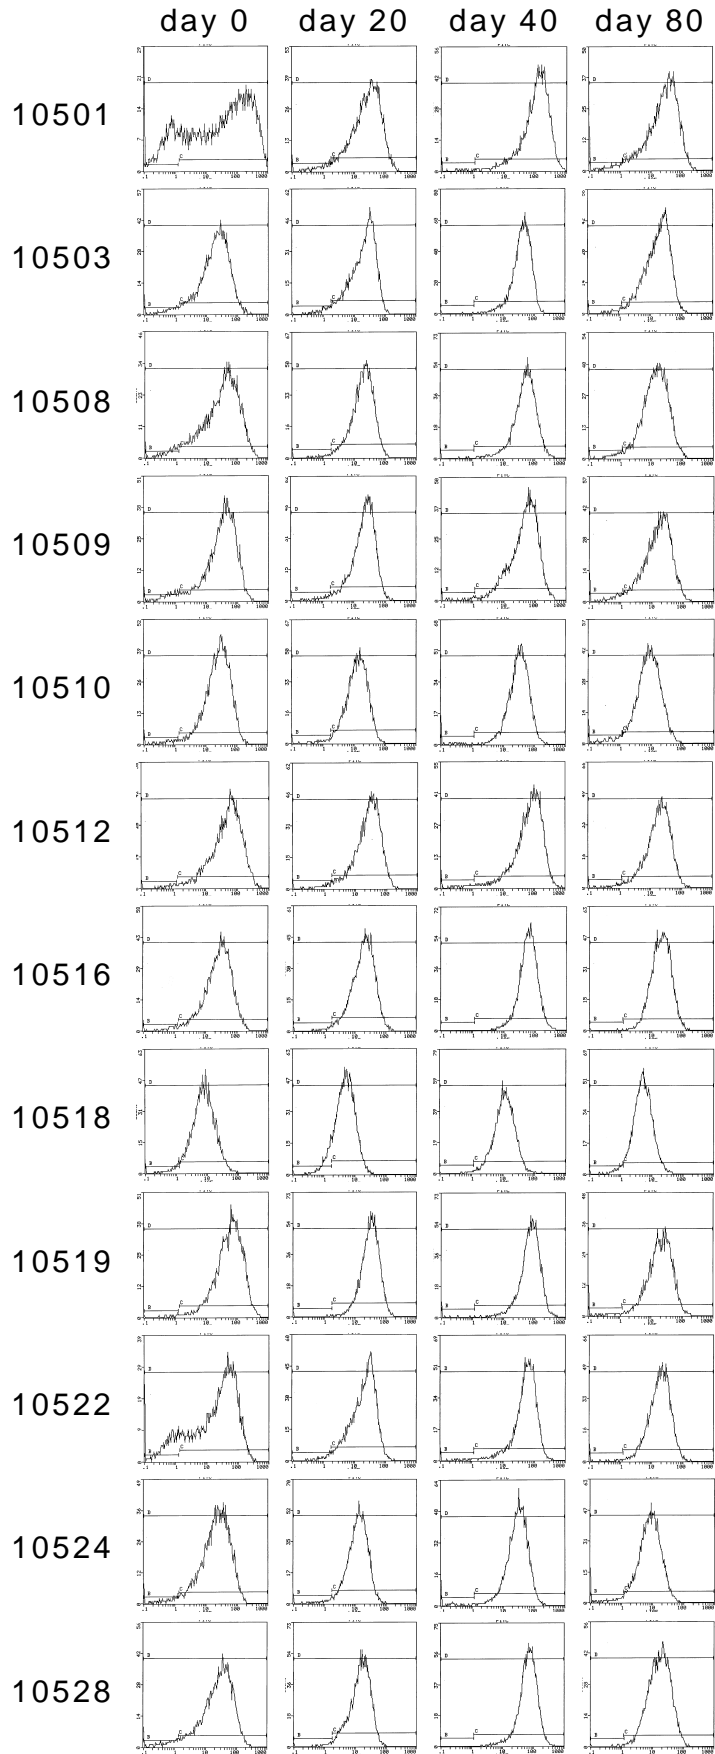

Supplement: pnas_99_10_6883__21.pdf [file pnas_99_10_6883__21.pdf]

**2 x 1.2  $\Delta$ II**  
**(single)**

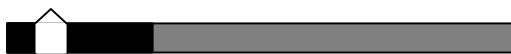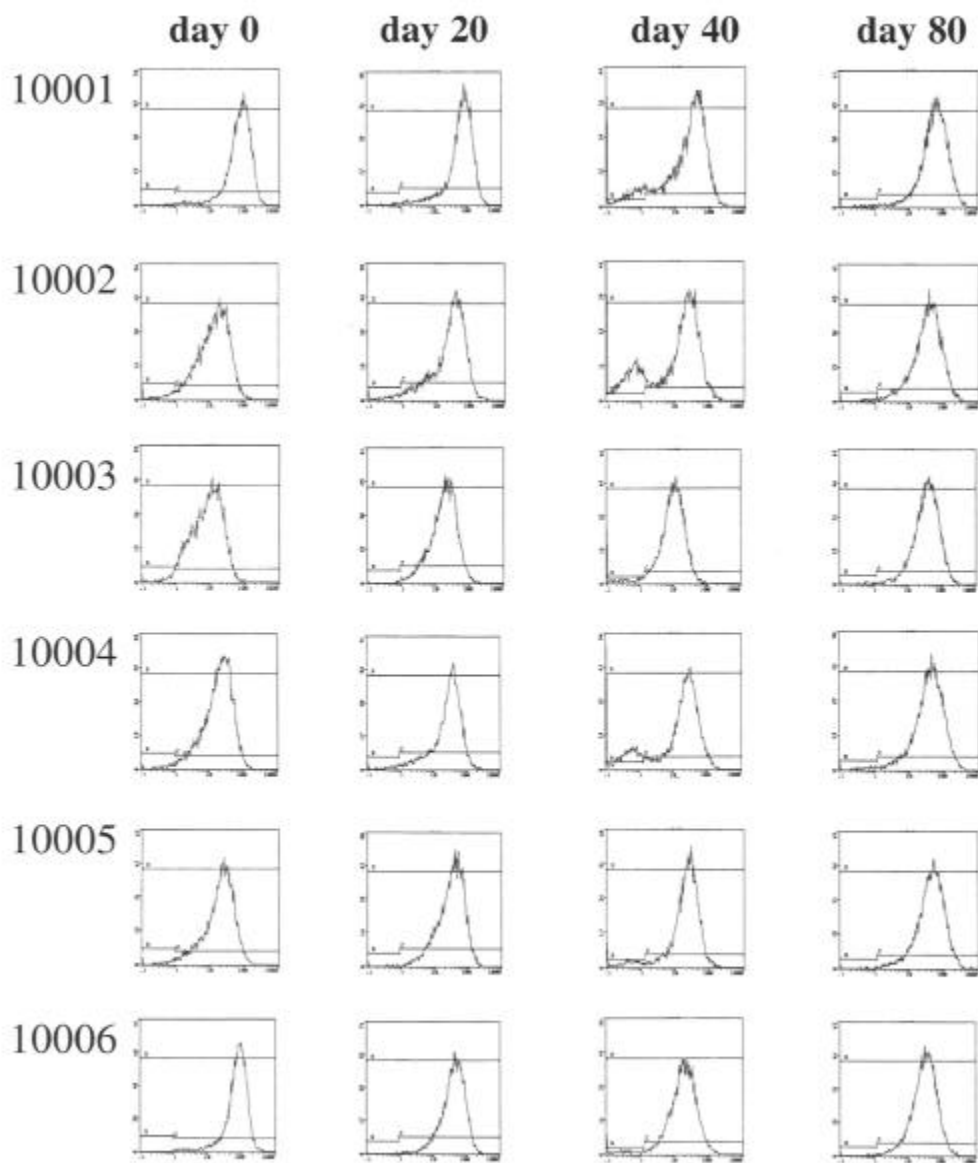

Supplement: pnas_99_10_6883__22.pdf [file pnas_99_10_6883__22.pdf]

2 x 1.2  $\Delta$ II  
(multi)

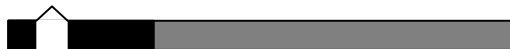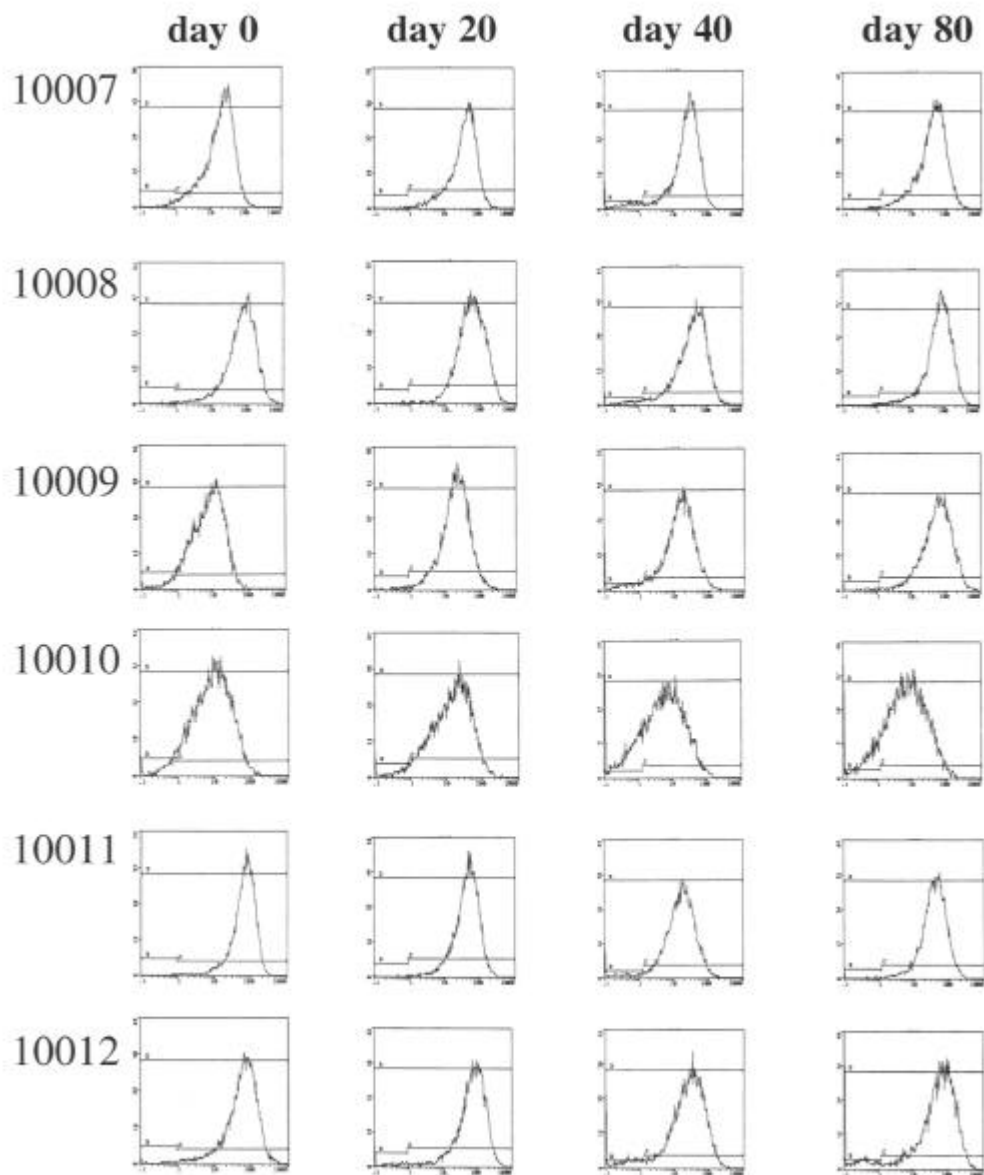

Supplement: pnas_99_10_6883__23.pdf [file pnas_99_10_6883__23.pdf]

2 x 1.2  $\Delta$ II/III  
(single)

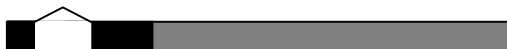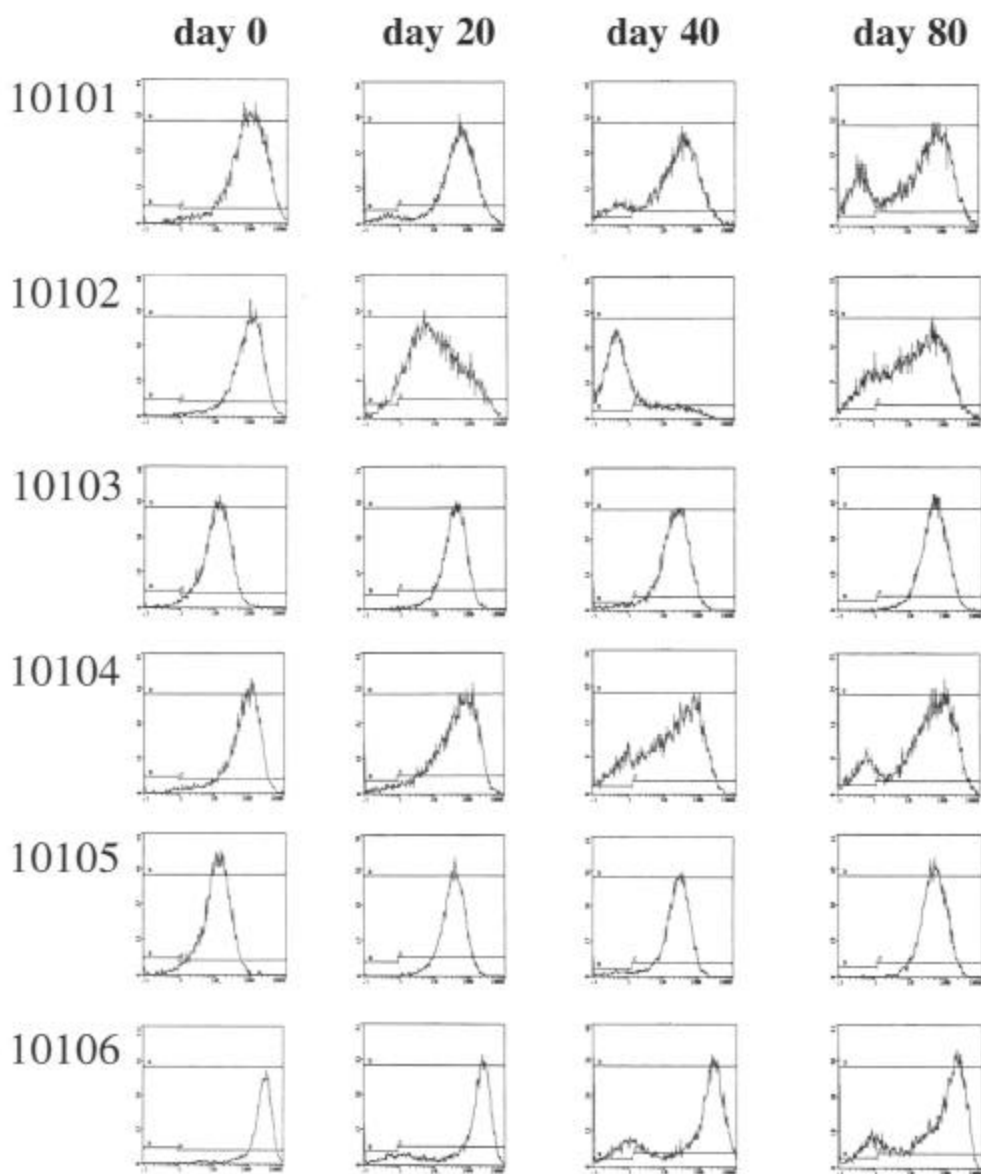

Supplement: pnas_99_10_6883__24.pdf [file pnas_99_10_6883__24.pdf]

2 x 1.2  $\Delta$ II/III  
(multi)

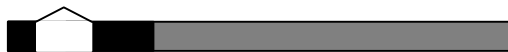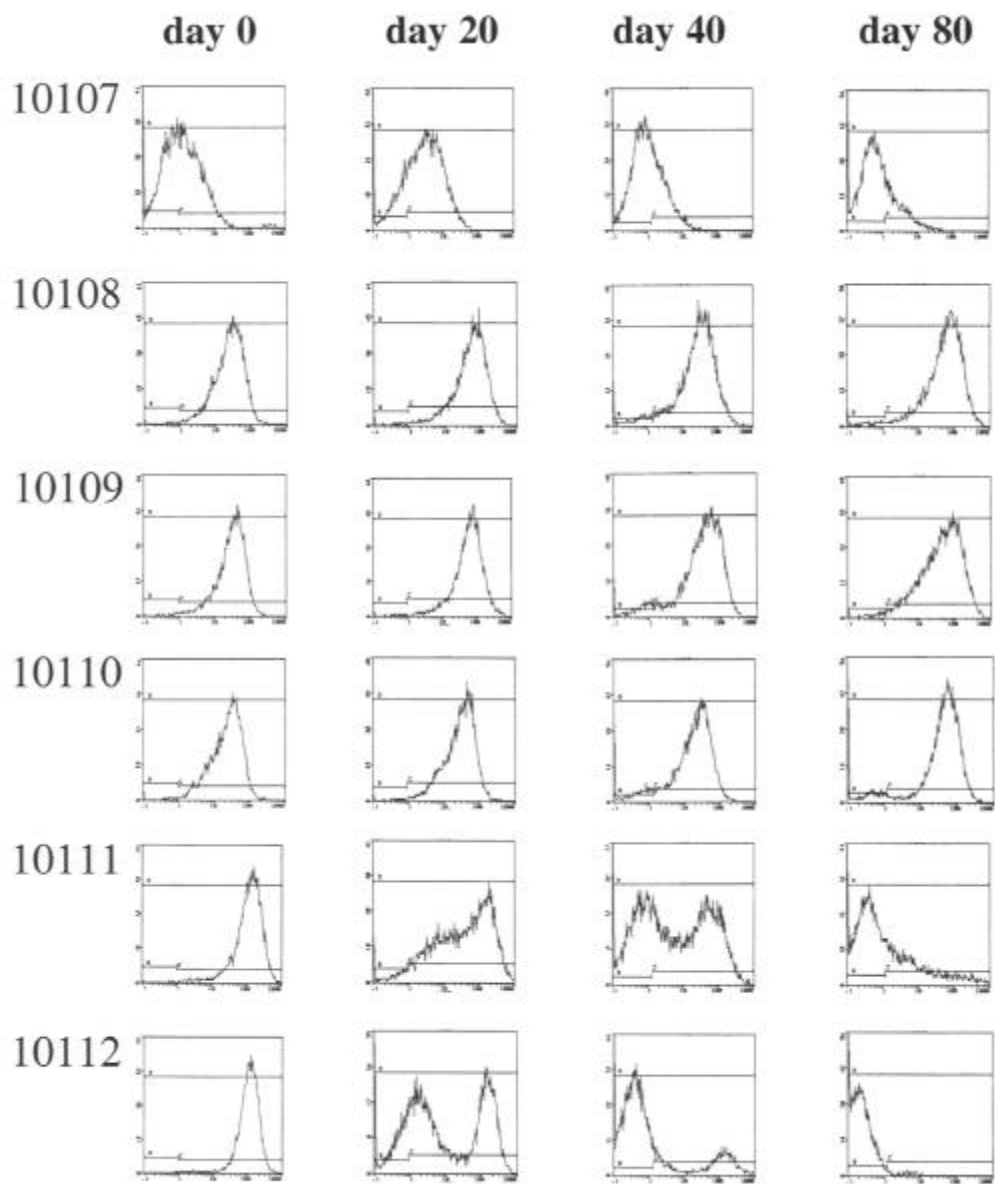

Supplement: pnas_99_10_6883__25.pdf [file pnas_99_10_6883__25.pdf]

**2 x core  $\Delta I$   
(multi)**

**II III IV V**

day 0

day 40

day 80

10405

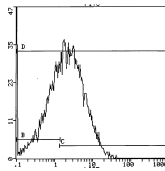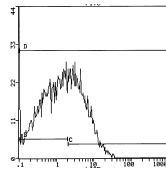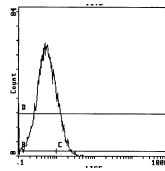

10406

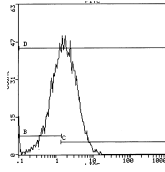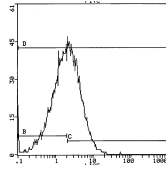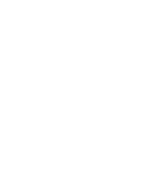

10412

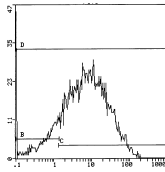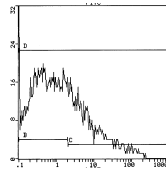

10413

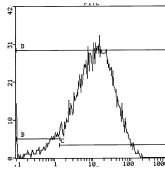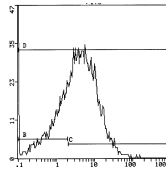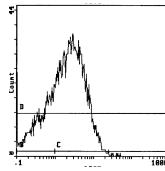

10414

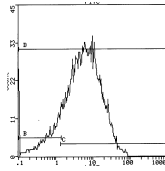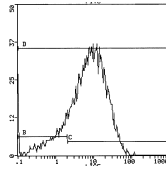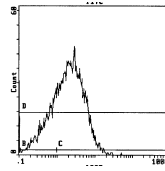

10416

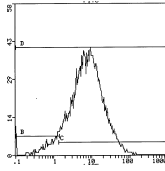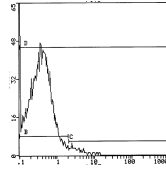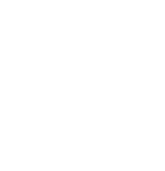

10417

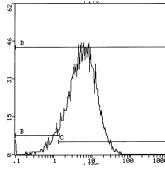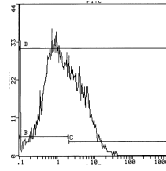

10418

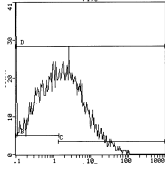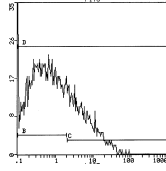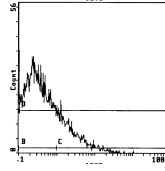

Supplement: pnas_99_10_6883__26.pdf [file pnas_99_10_6883__26.pdf]

2 x core DIII  
(single)

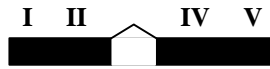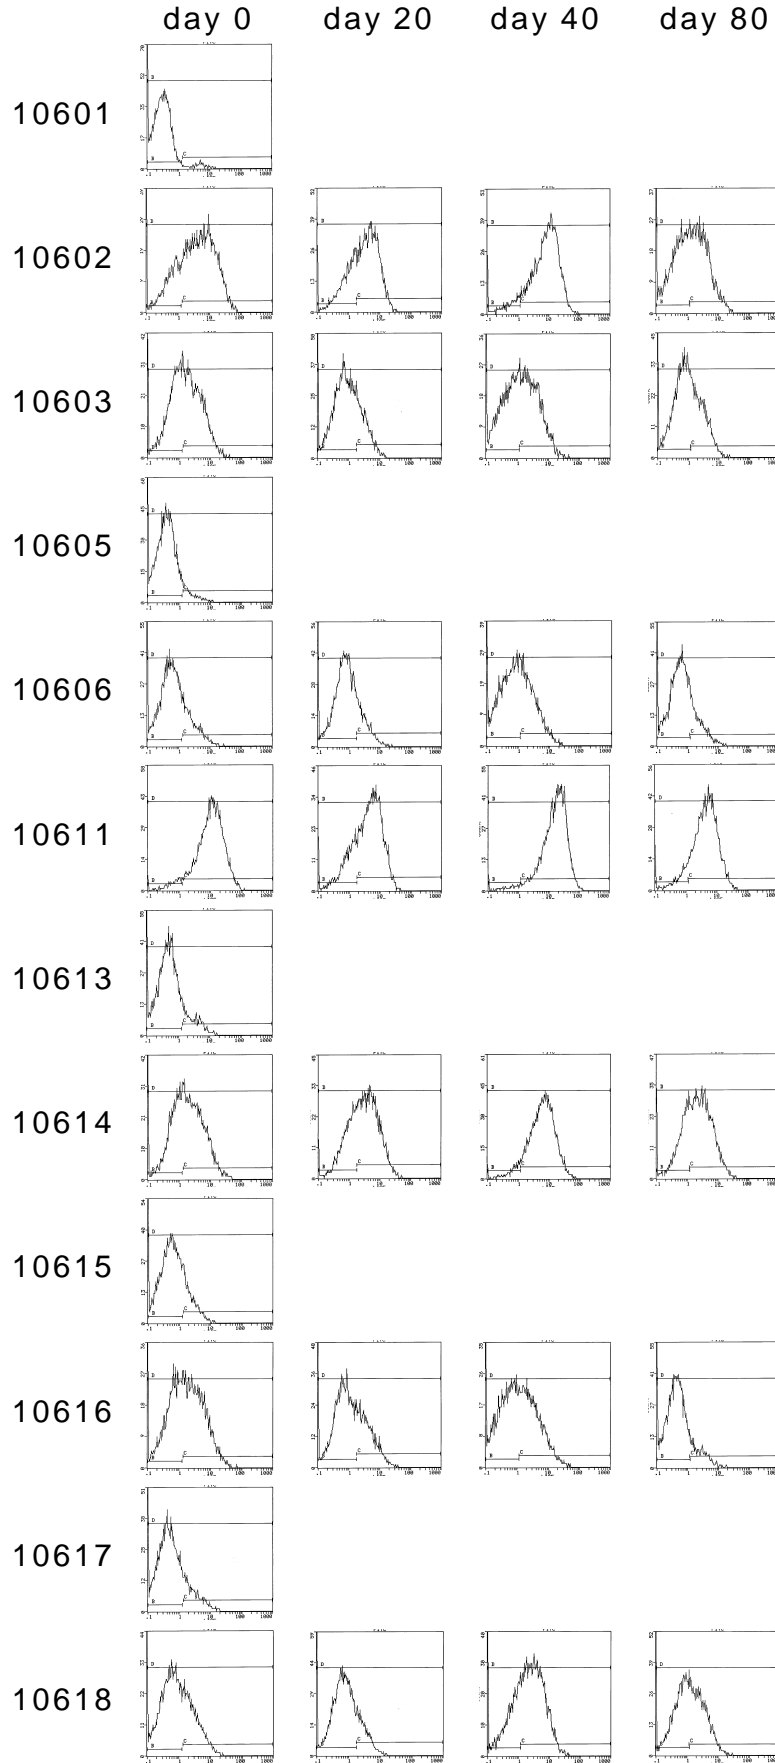

Supplement: pnas_99_10_6883__27.pdf [file pnas_99_10_6883__27.pdf]

2 x core DIII  
(multi)

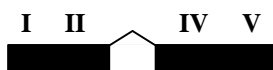

day 0

day 20

day 40

day 80

10600

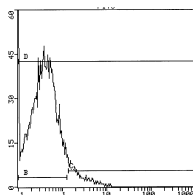

10604

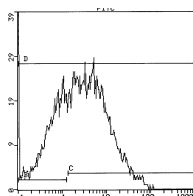

10607

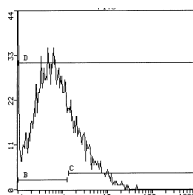

10608

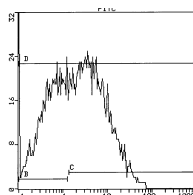

10609

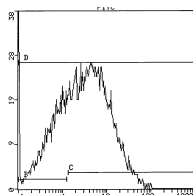

10610

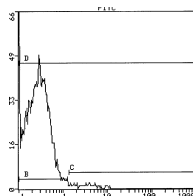

10612

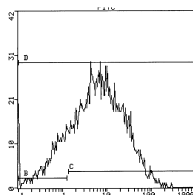

10619

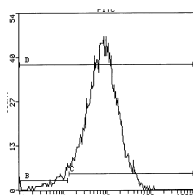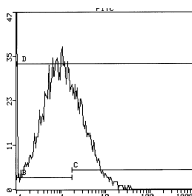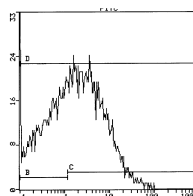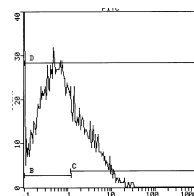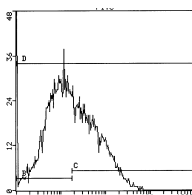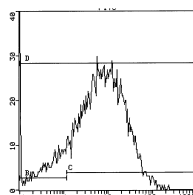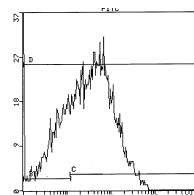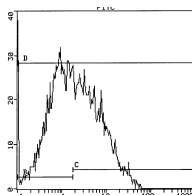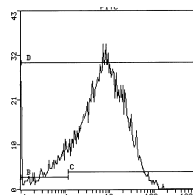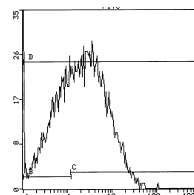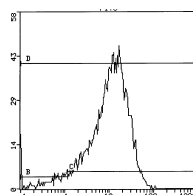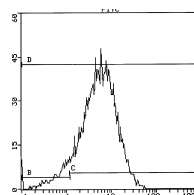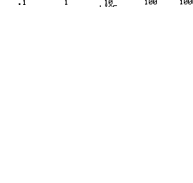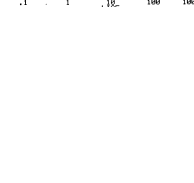

Supplement: pnas_99_10_6883__28.pdf [file pnas_99_10_6883__28.pdf]

2 x core DIV  
(multi)

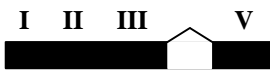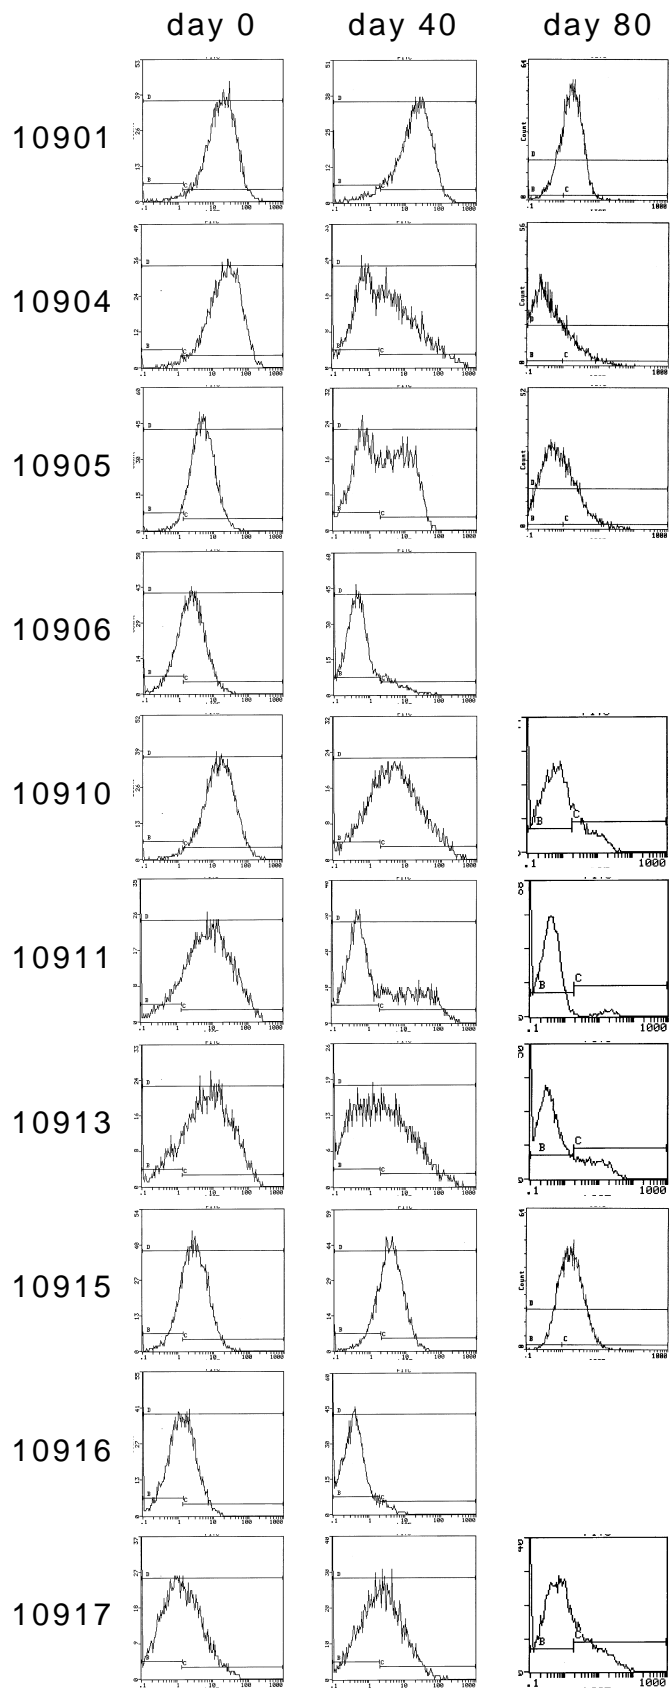

Supplement: pnas_99_10_6883__29.pdf [file pnas_99_10_6883__29.pdf]

2 x core DV  
(multi)

I II III IV

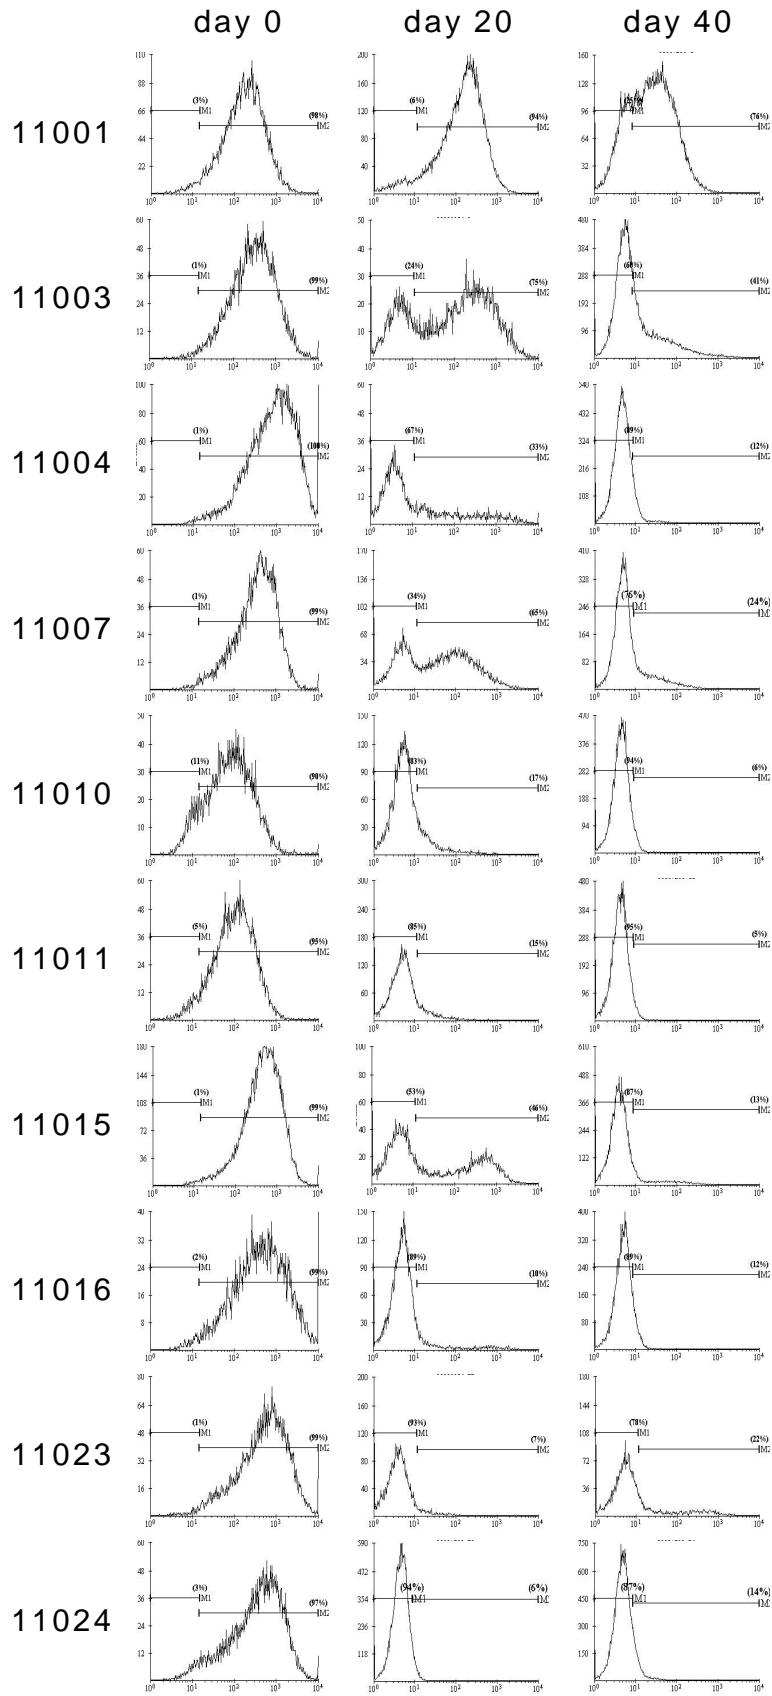

Supplement: pnas_99_10_6883__30.pdf [file pnas_99_10_6883__30.pdf]

**2 x core DI-II  
(single)**

**III IV V**  
[Redacted]

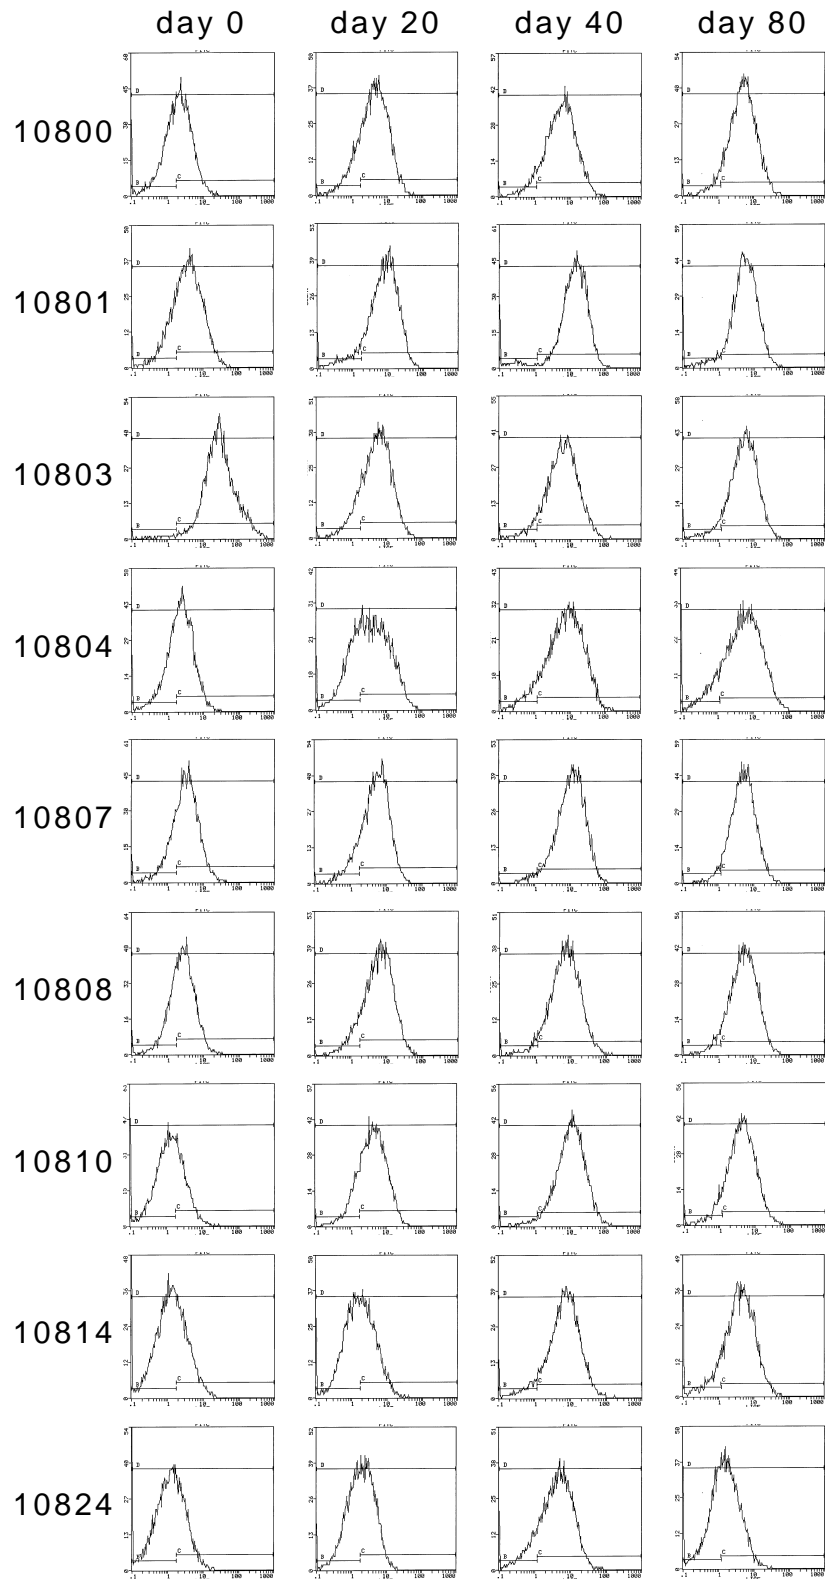

Supplement: pnas_99_10_6883__31.pdf [file pnas_99_10_6883__31.pdf]

2 x core DI-II  
(multi)

III IV V

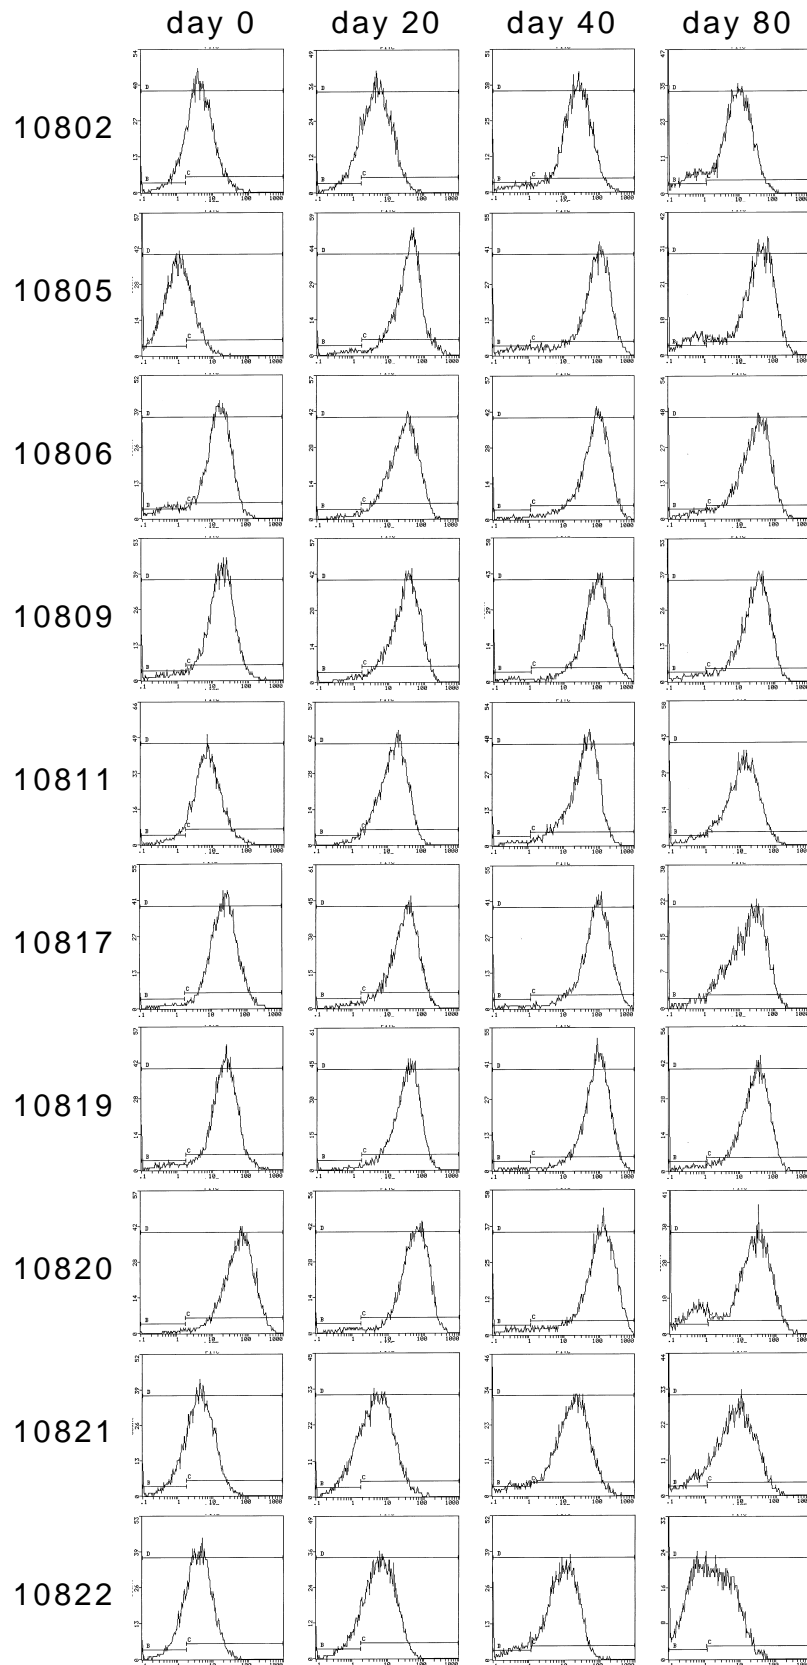

Supplement: pnas_99_10_6883__32.pdf [file pnas_99_10_6883__32.pdf]
